# Supplementary figures and images for: The pioneer factor OCT4 requires the chromatin remodeller BRG1 to support gene regulatory element function in mouse embryonic stem cells
Source: eLife journal article supplement (doi:10.7554/elife.22631), 2017-03-13

Figure 3 - Figure Supplement 1

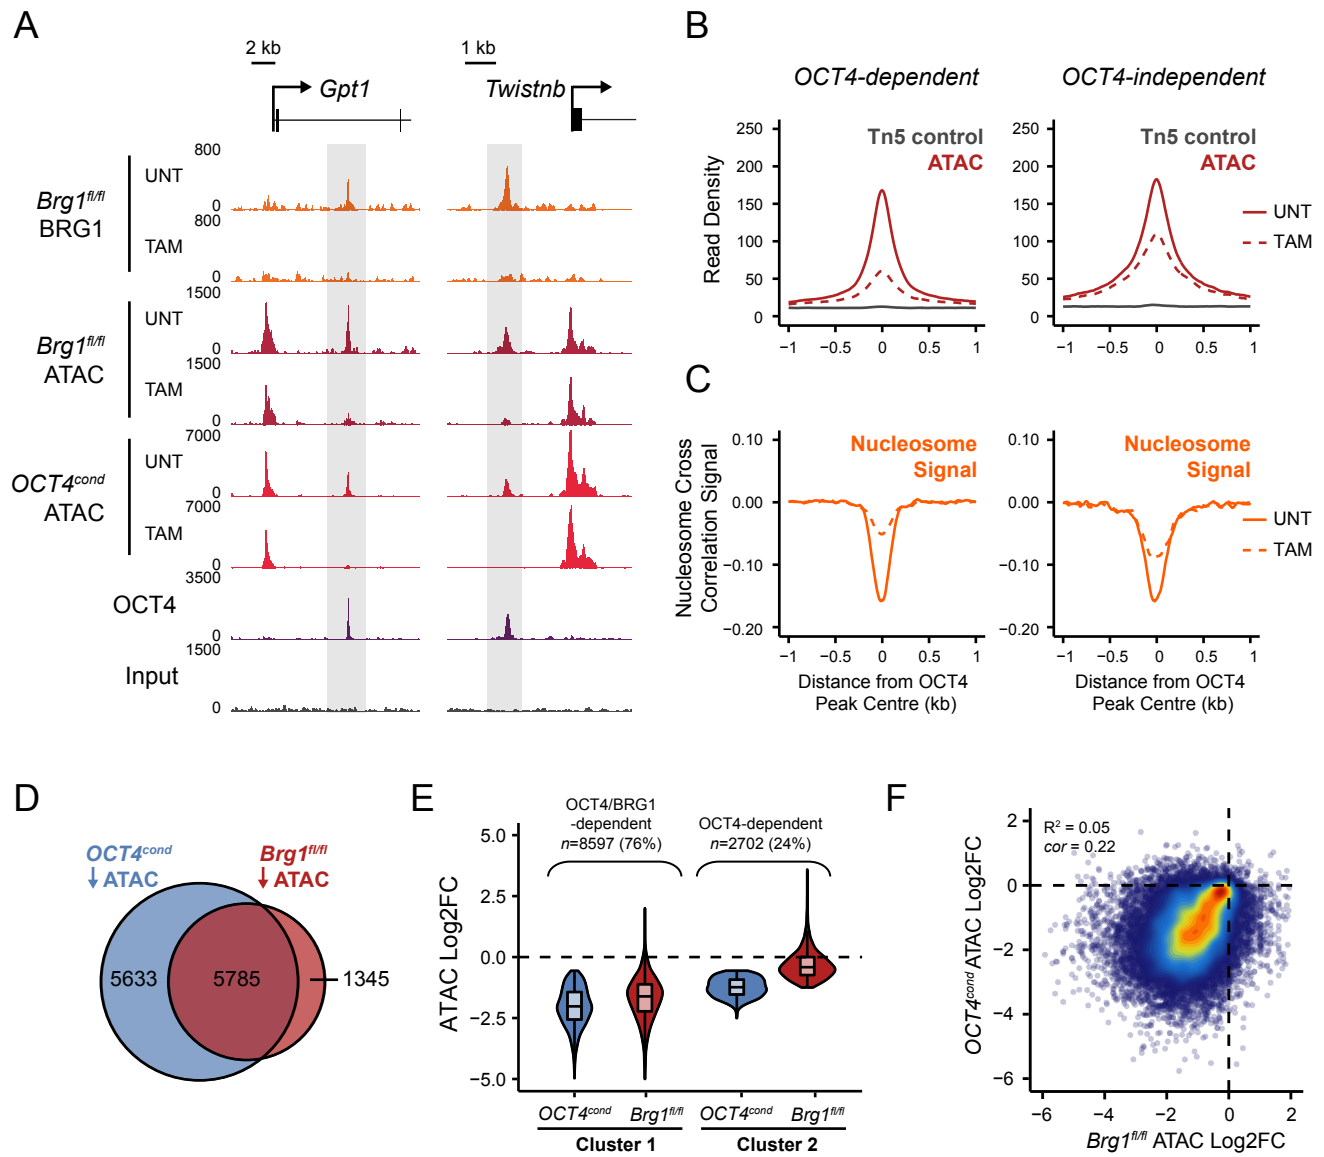

Supplement: supp [file elife-22631-supp-v2.zip]

Figure 1 - Supplement 1

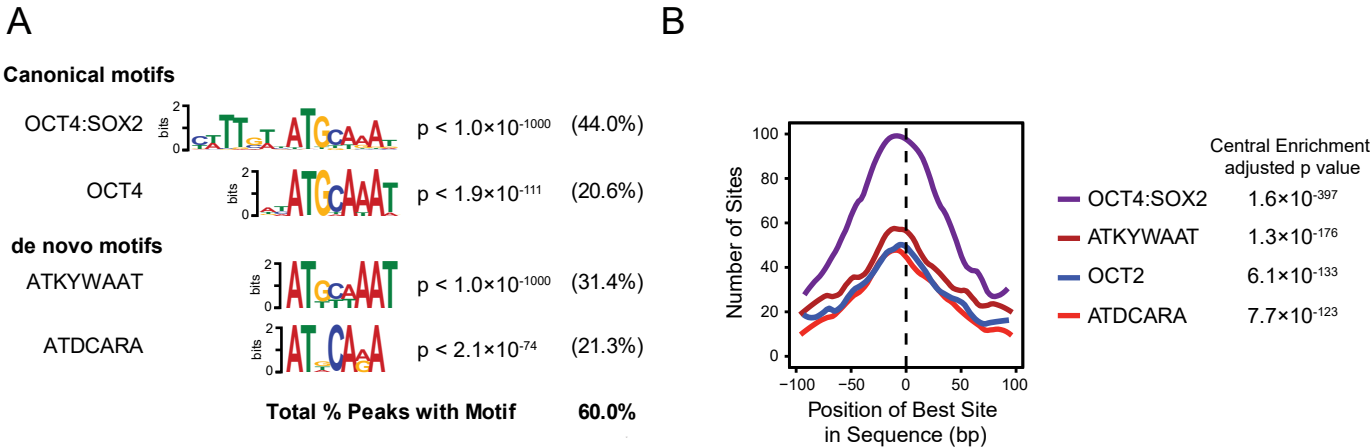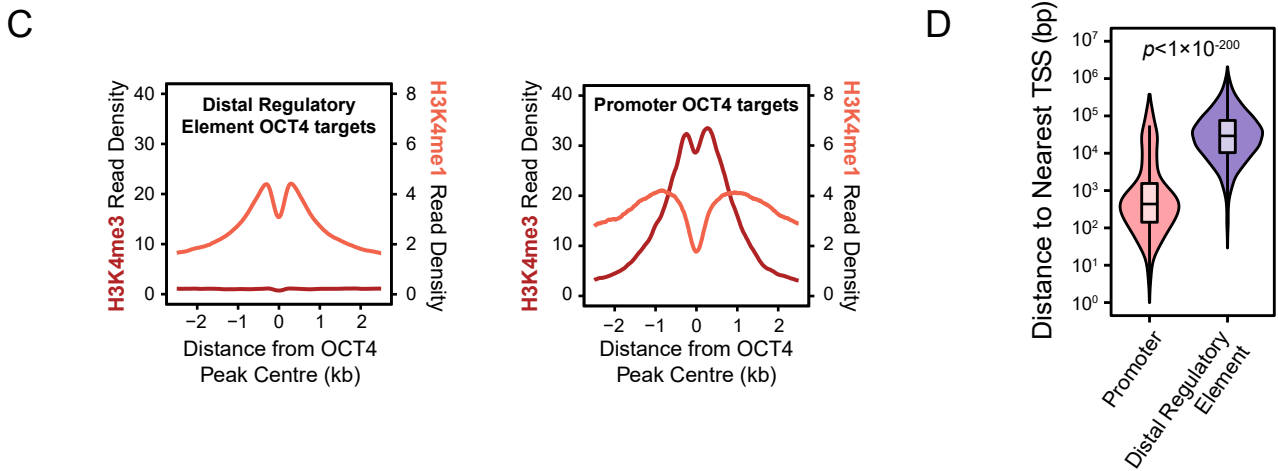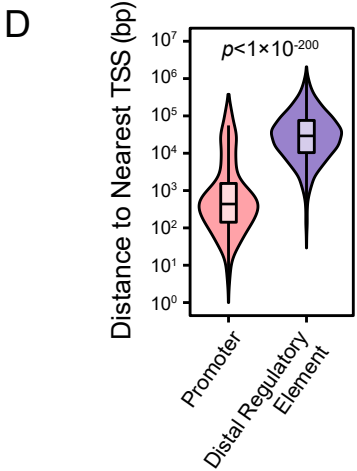

Supplement: supp [file elife-22631-supp-v2.zip]

Figure 5 - Figure Supplement 3

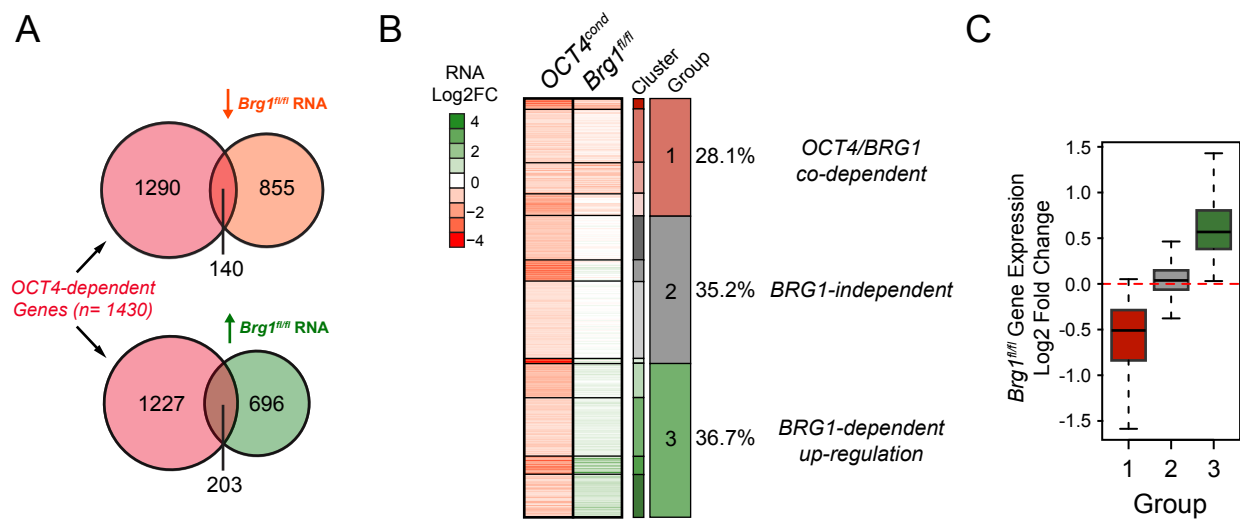

Supplement: supp [file elife-22631-supp-v2.zip]

Figure 5 - Figure Supplement 1

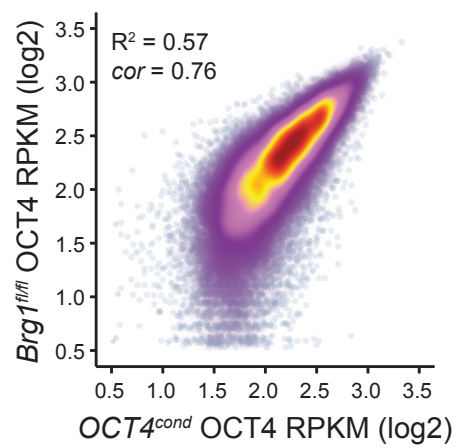

Supplement: supp [file elife-22631-supp-v2.zip]

Figure 5 - Figure Supplement 4

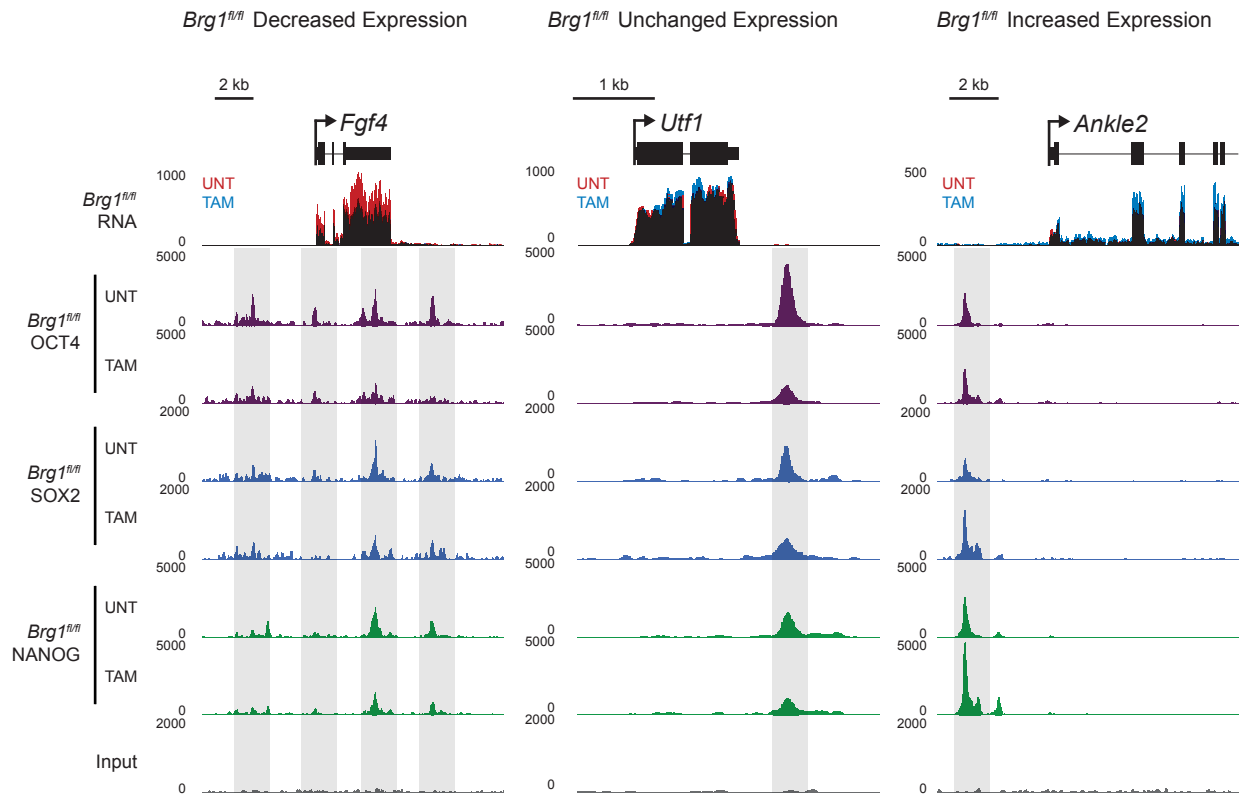

Supplement: supp [file elife-22631-supp-v2.zip]

Figure 5 - Figure Supplement 2

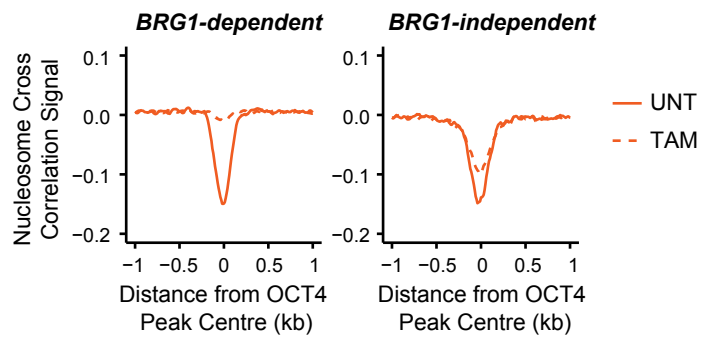

Supplement: supp [file elife-22631-supp-v2.zip]

Figure 1 - Figure Supplement 3

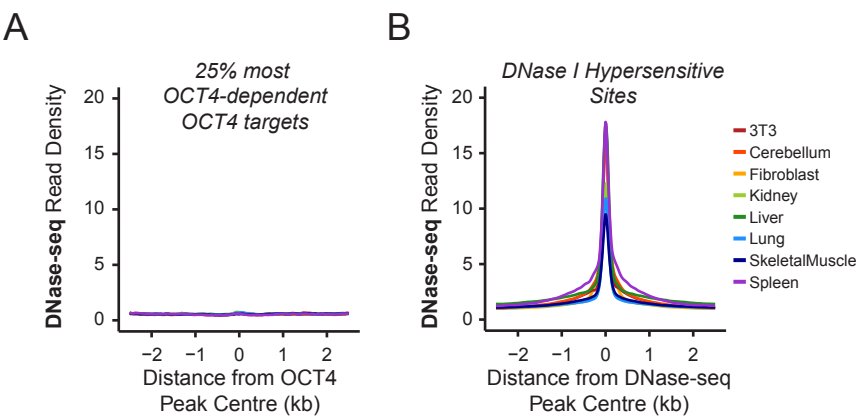

Supplement: supp [file elife-22631-supp-v2.zip]

Figure 2 - Supplement 1

A

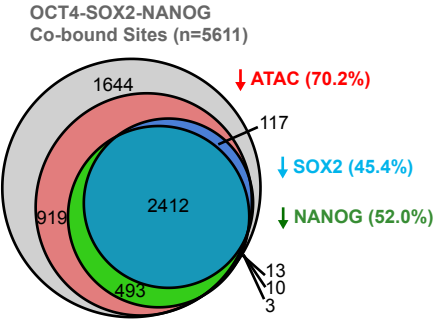

B

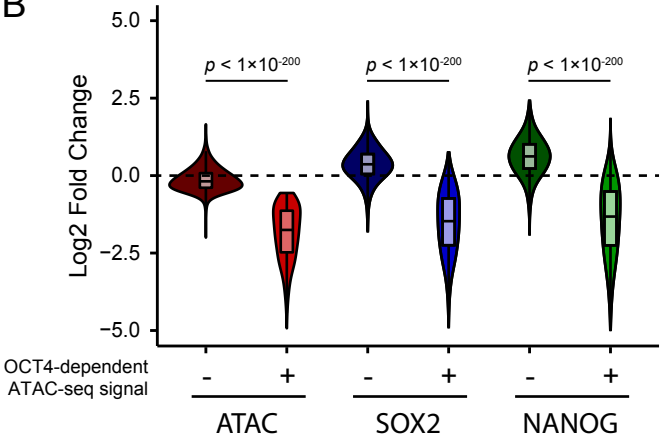

C

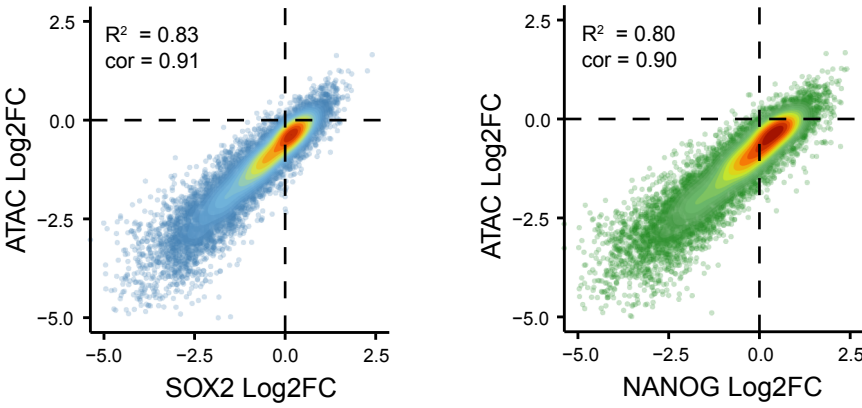

Supplement: supp [file elife-22631-supp-v2.zip]

Figure 1 - Figure Supplement 2

A

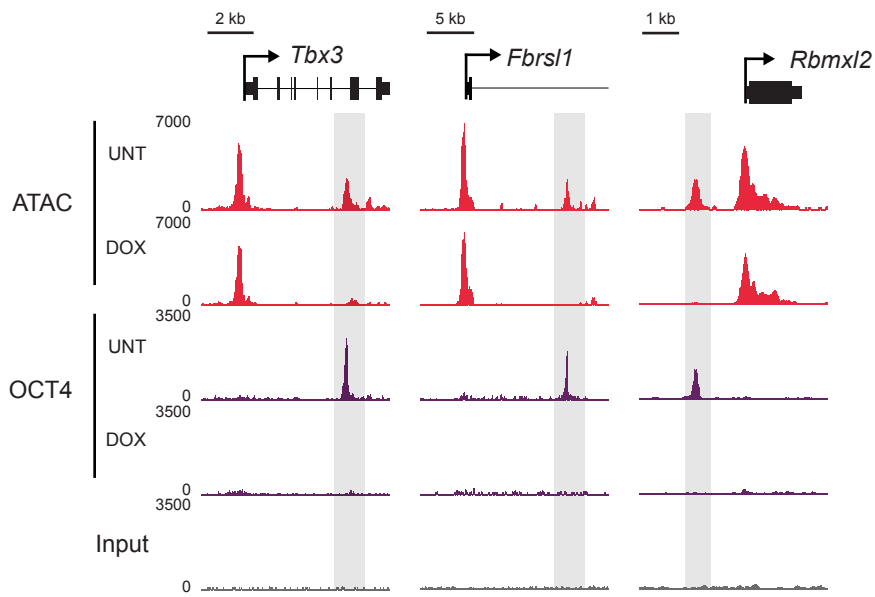

B

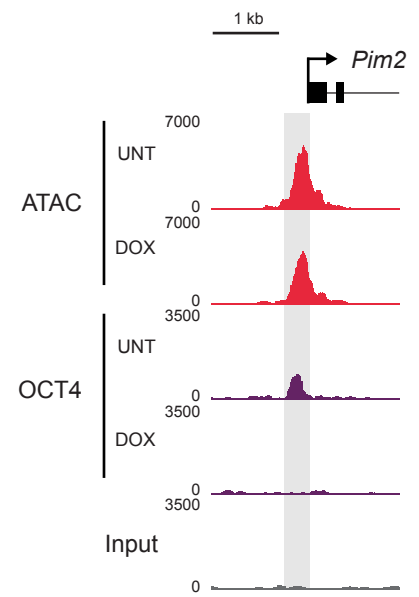

Supplement: supp [file elife-22631-supp-v2.zip]

Figure 6 - Figure Supplement 1

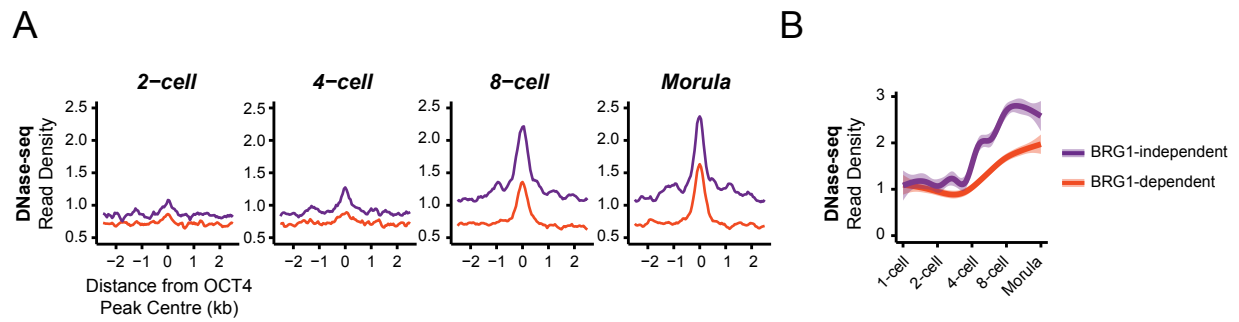

Supplement: supp [file elife-22631-supp-v2.zip]
